# Supplementary figures and images for: Development of Nanocrystal Compressed Minitablets for Chronotherapeutic Drug Delivery
Source: MDPI journal article supplement (doi:10.3390/ph15030311), 2022-03-04

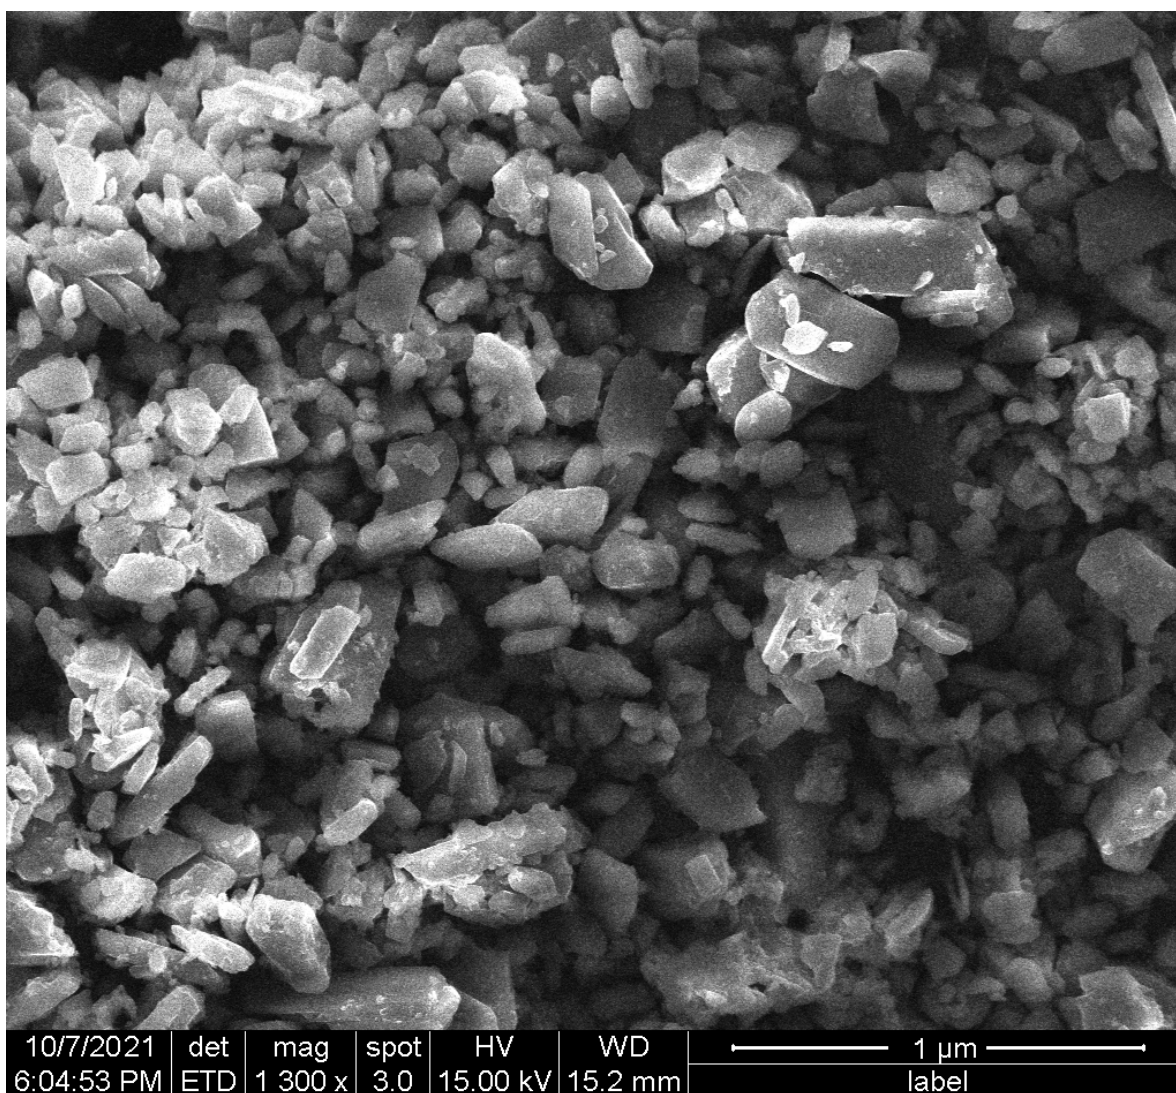

**Figure S1.** Scanning electron microscopy image of optimized nanocrystal formulation.

Supplement: s1 [file s1]
